# Supplementary material for: Co-culturing Hyphomicrobium nitrativorans strain NL23 and Methylophaga nitratireducenticrescens strain JAM1 allows sustainable denitrifying activities under marine conditions
Source: PeerJ journal article supplement (doi:10.7717/peerj.12424), 2021-11-01
Supplement: Figure_S1.pdf [file Figure_S1.pdf]

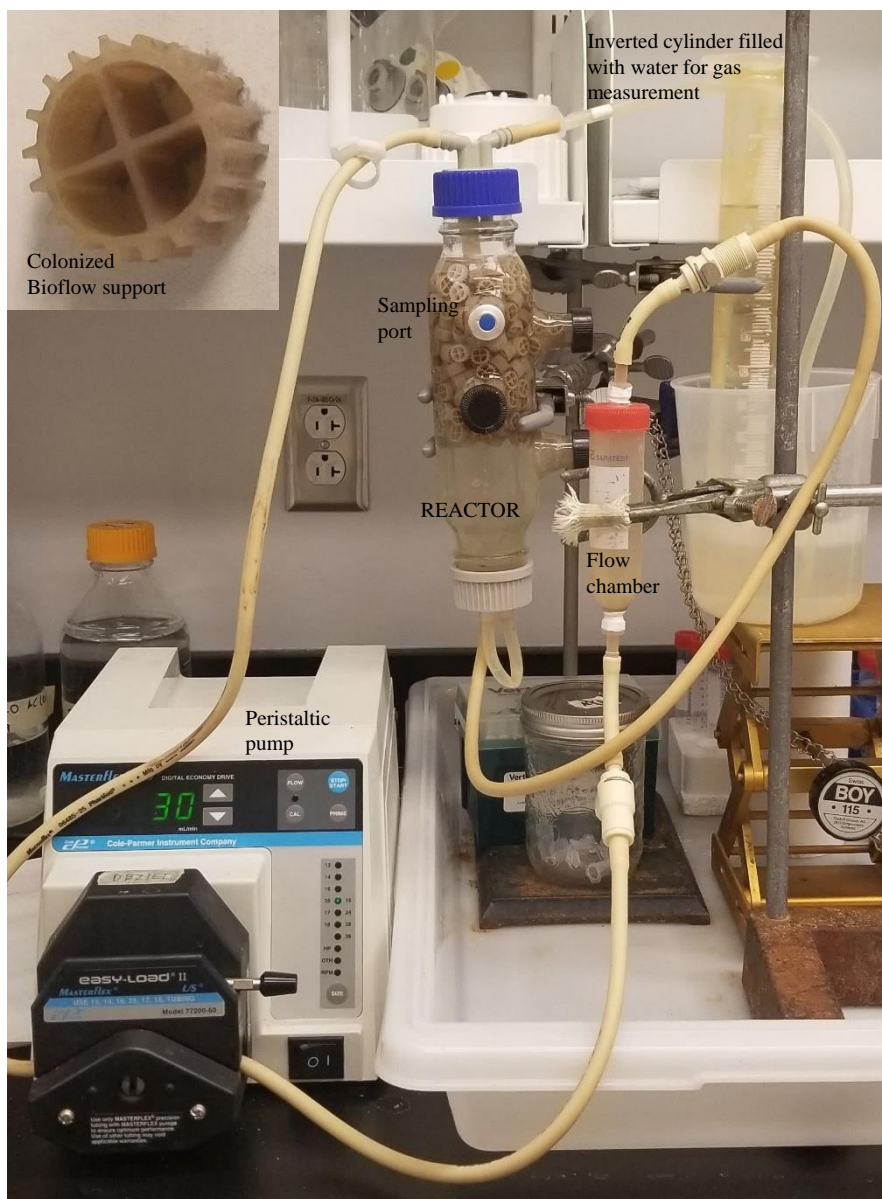

**Figure S1. Configuration of the reactor**
