# Supplementary material for: Co-culturing Hyphomicrobium nitrativorans strain NL23 and Methylophaga nitratireducenticrescens strain JAM1 allows sustainable denitrifying activities under marine conditions
Source: PeerJ. 2021 Nov 1;9:e12424. doi: 10.7717/peerj.12424 (PMC8567858; doi:10.7717/peerj.12424)
Supplement: Supplemental Information 4 [file peerj-09-12424-s004.xlsx]

## Sheet: Figure 1
Panel A
	JAM1, 25 mM nitrate							NL23, 25 mM nitrate
Time (h)	Growth (OD 600 nm)						Time (h)	Growth (OD 600 nm)
	Rep1	Rep2	Rep3	Average	SD			Rep1	Rep2	Rep3	Average	SD
0	0.058	0.053	0.048	0.053	0.005		0	0.066	0.067	0.072	0.0683333	0.00321455
6	0.089	0.095	0.097	0.0936667	0.00416333		24	0.063	0.086	0.07	0.073	0.0117898
12	0.173	0.178	0.184	0.178333	0.00550757		48	0.07	0.066	0.121	0.0856667	0.0306649
24	0.22	0.193	0.208	0.207	0.0135277		72	0.079	0.086	0.097	0.0873333	0.00907377
30	0.277	0.225	0.255	0.252333	0.0261024		96	0.165	0.158	0.171	0.164667	0.00650641
36	0.259	0.254	0.251	0.254667	0.00404145		120	0.251	0.265	0.289	0.268333	0.019218
48	0.236	0.225	0.264	0.241667	0.020108		144	0.397	0.355	0.372	0.374667	0.0211266
56	0.236	0.225	0.239	0.233333	0.00737111		168	0.385	0.346	0.371	0.367333	0.0197569
75	0.238	0.24	0.249	0.242333	0.00585947		192	0.376	0.351	0.334	0.353667	0.0211266
							216	0.369	0.338	0.335	0.347333	0.0188237
Panel B
	Methylophaga nitratireducenticrescens strain JAM1										Hyphomicrobium nitrativorans strain NL23
	growth rate µ OD600nm hour-1										growth rate µ OD600nm hour-1
NO3 mM	Rep1	Rep2	Rep3	Rep4	Rep5	Rep6	Rep7	Rep8		mM	Rep1	Rep2	Rep3	Rep4	Rep5	rep6
1.61364	0.0021	0.0024	0.0025							1.9992	0.001	0.0008	0.0007
1.785	0.0027	0.0033	0.0026							4.998	0.0006	0.0008	0.0006
2	0.0014	0.0014	0.0016	0.0012	0.0013	0.0015	0.0015	0.0015		7.14	0.0029	0.0021	0.002
3.57	0.0043	0.005	0.002							9.996	0.0021	0.0027	0.0019
4.04124	0.0031	0.0031	0.0033							14.28	0.0038	0.0038	0.004	0.0023	0.0025	0.0025
5	0.0021	0.0021	0.0019							19.992	0.0043	0.0046	0.003
7.14	0.0061	0.006	0.0027	0.0031	0.003	0.0032				24.99	0.0043	0.0039	0.0038
8.07534	0.0044	0.0039	0.0046							35.7	0.0052	0.0059	0.0057
10	0.0031	0.0029	0.0032							39.984	0.0058	0.0056	0.0054
12.1166	0.005	0.0048	0.0048							42.84	0.0049	0.0042	0.0043
14.28	0.0076	0.0083	0.0077							71.4	0.0048	0.0043	0.0037	0.0057	0.0049	0.0059
16.1507	0.006	0.006	0.0064							107.1	0.0026	0.0026	0.0026
20	0.0085	0.0075	0.0073
21.42	0.0034	0.0061	0.0068
24.2332	0.008	0.006	0.008
25	0.0073	0.0055	0.0067
32.3085	0.0073	0.0087	0.0075
40	0.0081	0.0084	0.0077
40.3838	0.0089	0.0098	0.0091
42.84	0.0083	0.0065	0.0078
71.4	0.0133	0.0099	0.0082
Non linear fit analysis by Prism v5.0
	JAM1	NL23
Michaelis-Menten
Best-fit values
VMAX	0.01102	0.006562
KM	12.56	15.32
Std. Error
VMAX	0.0007039	0.0004909
KM	2.091	3.236
95% Confidence Intervals
VMAX	0.009615 to 0.01243	0.005566 to 0.007557
KM	8.384 to 16.74	8.764 to 21.88
Goodness of Fit
Degrees of Freedom	69	37
R²	0.7913	0.8086
Absolute Sum of Squares	0.0001112	2.046e-05
Sy.x	0.00127	0.0007436
Constraints
KM	KM > 0.0	KM > 0.0
Number of points
Analyzed	71	39
Panel C
	JAM1							NL23
mM NO3	NO3 reduction rate mM hour-1						mM NO3	NO3 reduction rate mM hour-1
	Rep1	Rep2	Rep3					Rep1	Rep2	Rep3
9.6	0.432646	0.436076	0.454543				2	0.0448	0.0841	0.0458
16.1	0.6325	0.6184	0.5672				5	0.0811	0.0841	0.1336
24.2	0.7949	0.7268	0.7094				10	0.1256	0.1245	0.1319
32.3	0.774	0.7803	0.9049				14.3	0.1909	0.1896	0.1864
42.8	0.7619	0.748	0.819				20	0.236	0.2601	0.2664
71.4	0.9632	0.7921	0.7355				25	0.3473	0.3218	0.3641
106.665	0.8603	0.8907	1.0348				35.7	0.4909	0.5655	0.5193
142.223	0.7971	0.8226	0.8248				40	0.4812	0.6693	0.6922
Panel D
	JAM1							NL23
NO3	Specific NO3 reduction rate mM hour-1 OD-1						mM NO3	specific NO3 reduction rate mM hour-1 OD-1
mM	Rep1	Rep2	Rep3					Rep1	Rep2	Rep3
9.63223	3.1238	3.62641	3.55112				2	0.4001	0.6834	0.3878
16.066	5.14228	4.64962	3.78133				5	0.5751	0.632	0.8845
24.094	5.40748	4.78946	5.05811				10	0.5708	0.6589	0.7497
32.122	4.29404	4.35314	4.45764				14.3	0.3943	0.4033	0.3627
42.6699	3.87933	3.48231	3.6143				20	0.6921	0.8727	0.8538
71.1066	5.03239	4.03721	3.42093				25	0.9092	0.9246	1.0315
106.665	4.93291	2.96505	5.33402				35.7	0.7094	0.849	0.7751
142.223	6.1695	6.26982	6.10963				40	1.1113	1.5074	1.5914
Average	4.47841						Average	0.772088
SD	0.964571						SD	0.318595

## Sheet: Fig.1 NL23 panel B
	D.O														28 ppm-N				70 ppm-N				140 ppm-N				200 ppm-N				280 ppm-N				350 ppm-N				500 ppm-N				560 ppm-N
	Sample	t0	t1	t2	t3	t4	t5	t6	t7	t8	t9			Time (h)	Rep1	Rep2	Rep3	Time (h)	Rep1	Rep2	Rep3	Time (h)	Rep1	Rep2	Rep3	Time (h)	Rep1	Rep2	Rep3	Time (h)	Rep1	Rep2	Rep3	Time (h)	Rep1	Rep2	Rep3	Time (h)	Rep1	Rep2	Rep3	Time (h)	Rep1	Rep2	Rep3
mg-N/L	Time (h)	0	24	48	72	96	120	144	168	192	216			0	0.071	0.066	0.074	0	0.065	0.064	0.078	0	0.065	0.065	0.066	0	0.182	0.17	0.181	0	0.071	0.07	0.064	0	0.066	0.067	0.072	0	0.183	0.18	0.176	0	0.066	0.09	0.079
28	Rep1	0.071	0.096	0.117	0.114	0.117	0.118	0.117	0.107	0.111	0.097			24	0.096	0.085	0.094	24	0.069	0.075	0.098	24	0.087	0.07	0.068	24	0.247	0.256	0.262	24	0.082	0.077	0.085	24	0.063	0.086	0.07	24	0.279	0.28	0.3	24	0.086	0.121	0.093
	Rep2	0.066	0.085	0.111	0.119	0.138	0.128	0.137	0.113	0.113	0.114			48	0.117	0.111	0.102	48	0.08	0.086	0.113	48	0.075	0.07	0.089	48	0.293	0.298	0.304	48	0.077	0.062	0.075	48	0.07	0.066	0.121	48	0.313	0.325	0.329	48	0.074	0.101	0.105
	Rep3	0.074	0.094	0.102	0.125	0.124	0.124	0.124	0.114	0.112	0.112			72	0.114	0.119	0.125	72	0.098	0.09	0.104	72	0.089	0.086	0.088	72	0.458	0.472	0.48	72	0.107	0.098	0.092	72	0.079	0.086	0.097	72	0.53	0.509	0.52	72	0.098	0.127	0.128
	Average	0.0703333	0.0916667	0.11	0.119333	0.126333	0.123333	0.126	0.111333	0.112	0.107667			96	0.117	0.138	0.124	96	0.125	0.118	0.18	96	0.174	0.136	0.138	96	0.51	0.498	0.507	96	0.218	0.167	0.168	96	0.165	0.158	0.171	96	0.601	0.624	0.7	96	0.162	0.183	0.209
	SD	0.00404145	0.00585947	0.00754983	0.00550757	0.0106927	0.00503322	0.0101489	0.00378594	0.001	0.00929157			120	0.118	0.128	0.124	120	0.142	0.13	0.158	120	0.22	0.188	0.178	120	0.52	0.493	0.597	120	0.314	0.234	0.315	120	0.251	0.265	0.289	120	0.758	0.706	0.725	120	0.343	0.403	0.414
70	Rep1	0.065	0.069	0.08	0.098	0.125	0.142	0.141	0.134	0.147	0.141			144	0.117	0.137	0.124	144	0.141	0.137	0.164	144	0.209	0.202	0.178	144	0.481	0.482	0.498	144	0.34	0.312	0.327	144	0.397	0.355	0.372	144	0.697	0.684	0.696	144	0.486	0.516	0.492
	Rep2	0.064	0.075	0.086	0.09	0.118	0.13	0.137	0.137	0.132	0.127			168	0.107	0.113	0.114	168	0.134	0.137	0.157	168	0.226	0.19	0.176	168	0.467	0.459	0.488	168	0.341	0.3	0.316	168	0.385	0.346	0.371	168	0.679	0.62	0.649	168	0.445	0.48	0.478
	Rep3	0.078	0.098	0.113	0.104	0.18	0.158	0.164	0.157	0.137	0.139			192	0.111	0.113	0.112	192	0.147	0.132	0.137	192	0.229	0.188	0.171	192	0.468	0.446	0.472	192	0.347	0.293	0.304	192	0.376	0.351	0.334	192	0.633	0.654	0.611	192	0.412	0.416	0.4
	Average	0.069	0.0806667	0.093	0.0973333	0.141	0.143333	0.147333	0.142667	0.138667	0.135667			216	0.097	0.114	0.112	216	0.141	0.127	0.139	216	0.215	0.175	0.177	216				216	0.335	0.285	0.299	216	0.369	0.338	0.335	216				216	0.388	0.364	0.371
	SD	0.00781025	0.015308	0.0175784	0.00702377	0.0339559	0.0140475	0.0145717	0.0125033	0.00763763	0.00757188
140	Rep1	0.065	0.087	0.075	0.089	0.174	0.22	0.209	0.226	0.229	0.215
	Rep2	0.065	0.07	0.07	0.086	0.136	0.188	0.202	0.19	0.188	0.175				28 ppm-N				70 ppm-N				140 ppm-N				200 ppm-N				280 ppm-N				350 ppm-N				500 ppm-N				560 ppm-N						28
	Rep3	0.066	0.068	0.089	0.088	0.138	0.178	0.178	0.176	0.171	0.177			Time (h)	Rep1	Rep2	Rep3	Time (h)	Rep1	Rep2	Rep3	Time (h)	Rep1	Rep2	Rep3	Time (h)	Rep1	Rep2	Rep3	Time (h)	Rep1	Rep2	Rep3	Time (h)	Rep1	Rep2	Rep3	Time (h)	Rep1	Rep2	Rep3	Time (h)	Rep1	Rep2	Rep3				70
	Average	0.0653333	0.075	0.078	0.0876667	0.149333	0.195333	0.196333	0.197333	0.196	0.189			0	0.071	0.066	0.074	0				0				0																0							140
	SD	0.00057735	0.0104403	0.00984886	0.00152753	0.0213854	0.0219393	0.0162583	0.0257941	0.0298161	0.0225389			24	0.096	0.085	0.094	24	0.069	0.075	0.098	24				24	0.247	0.256	0.262													24							200
280	Rep1	0.071	0.082	0.077	0.107	0.218	0.314	0.34	0.341	0.347	0.335			48	0.117	0.111	0.102	48	0.08	0.086	0.113	48				48	0.293	0.298	0.304									48	0.313	0.325	0.329	48							280
	Rep2	0.07	0.077	0.062	0.098	0.167	0.234	0.312	0.3	0.293	0.285			72		0.119	0.125	72	0.098	0.09		72	0.089	0.086	0.088	72	0.458	0.472	0.48	72	0.107	0.098	0.092	72	0.079	0.086	0.097	72	0.53	0.509	0.52	72	0.098	0.127	0.128				350
	Rep3	0.064	0.085	0.075	0.092	0.168	0.315	0.327	0.316	0.304	0.299							96	0.125	0.118		96	0.174	0.136	0.138	96	0.51	0.498	0.507	96	0.218	0.167	0.168	96	0.165	0.158	0.171	96	0.601	0.624	0.7	96	0.162	0.183	0.209				500
	Average	0.0683333	0.0813333	0.0713333	0.099	0.184333	0.287667	0.326333	0.319	0.314667	0.306333							120	0.142	0.13	0.158	120	0.22	0.188	0.178	120				120	0.314	0.234	0.315	120	0.251	0.265	0.289	120	0.758	0.706	0.725	120	0.343	0.403	0.414				560
	SD	0.00378594	0.00404145	0.00814453	0.00754983	0.0291605	0.0464794	0.0140119	0.020664	0.0285365	0.0257941																			144		0.312		144	0.397	0.355	0.372					144	0.486	0.516	0.492
350	Rep1	0.066	0.063	0.07	0.079	0.165	0.251	0.397	0.385	0.376	0.369
	Rep2	0.067	0.086	0.066	0.086	0.158	0.265	0.355	0.346	0.351	0.338
	Rep3	0.072	0.07	0.121	0.097	0.171	0.289	0.372	0.371	0.334	0.335
	Average	0.0683333	0.073	0.0856667	0.0873333	0.164667	0.268333	0.374667	0.367333	0.353667	0.347333			Grwowh Rate OD h-1	0.001	0.0008	0.0007		0.0006	0.0008	0.0006		0.0021	0.0027	0.0019		0.0038	0.0038	0.004		0.0043	0.0046	0.003		0.0043	0.0039	0.0038		0.0052	0.0059	0.0057		0.0058	0.0056	0.0054
	SD	0.00321455	0.0117898	0.0306649	0.00907377	0.00650641	0.019218	0.0211266	0.0197569	0.0211266	0.0188237
560	Rep1	0.066	0.086	0.074	0.098	0.162	0.343	0.486	0.445	0.412	0.388
	Rep2	0.09	0.121	0.101	0.127	0.183	0.403	0.516	0.48	0.416	0.364
	Rep3	0.079	0.093	0.105	0.128	0.209	0.414	0.492	0.478	0.4	0.371
	Average	0.0783333	0.1	0.0933333	0.117667	0.184667	0.386667	0.498	0.467667	0.409333	0.374333
	SD	0.0120139	0.0185203	0.0168622	0.0170392	0.0235443	0.0382143	0.0158745	0.0196554	0.00832666	0.0123423
	D.O
	Sample	t0	t1	t2	t3	t4	t5	t6	t7	t8
mg-N/L	Time (h)	0	24	48	72	96	120	144	168	192
200	Rep1	0.182	0.247	0.293	0.458	0.51	0.52	0.481	0.467	0.468
	Rep2	0.17	0.256	0.298	0.472	0.498	0.493	0.482	0.459	0.446																			Growh Rate OD h-1
	Rep3	0.181	0.262	0.304	0.48	0.507	0.597	0.498	0.488	0.472																	ppm-N	mM	Rep1	Rep2	Rep3	Rep4	Rep5	rep6
	Average	0.177667	0.255	0.298333	0.47	0.505	0.536667	0.487	0.471333	0.462																	28	1.9992	0.001	0.0008	0.0007
	SD	0.00665833	0.00754983	0.00550757	0.0111355	0.006245	0.053966	0.00953939	0.0149778	0.014																	70	4.998	0.0006	0.0008	0.0006
500	Rep1	0.183	0.279	0.313	0.53	0.601	0.758	0.697	0.679	0.633																	100	7.14	0.0029	0.0021	0.002
	Rep2	0.18	0.28	0.325	0.509	0.624	0.706	0.684	0.62	0.654																	140	9.996	0.0021	0.0027	0.0019
	Rep3	0.176	0.3	0.329	0.52	0.7	0.725	0.696	0.649	0.611																	200	14.28	0.0038	0.0038	0.004	0.0023	0.0025	0.0025
	Average	0.179667	0.286333	0.322333	0.519667	0.641667	0.729667	0.692333	0.649333	0.632667																	280	19.992	0.0043	0.0046	0.003
	SD	0.00351188	0.0118462	0.00832666	0.010504	0.0518106	0.0263122	0.00723418	0.0295014	0.0215019																	350	24.99	0.0043	0.0039	0.0038
																											500	35.7	0.0052	0.0059	0.0057
																											560	39.984	0.0058	0.0056	0.0054
																											600	42.84	0.0049	0.0042	0.0043
																											1000	71.4	0.0048	0.0043	0.0037	0.0057	0.0049	0.0059
																											1500	107.1	0.0026	0.0026	0.0026
	200 ppm-N	Rep1	Rep2	Rep3		600 ppm-N	Rep1	Rep2	Rep3		1000 ppm-N	Rep1	Rep2	Rep3		1500 ppm-N	Rep1	Rep2	Rep3
	0	0.115	0.125	0.13		0					0					0
	48	0.234	0.261	0.28		48	0.255	0.272	0.243		48	0.179	0.178	0.189		48	0.183	0.177	0.209
	70	0.29	0.296	0.283		70	0.385	0.402	0.372		70	0.295	0.34	0.274		70	0.249	0.222	0.214
	92					92	0.47	0.456	0.433		92	0.405	0.456	0.355		92	0.31	0.305	0.302
						143					143	0.596	0.648	0.538		143	0.441	0.442	0.453
											166					166	0.485	0.468	0.49
											190					190
	100 ppm-N				1000 ppm-N					100 ppm-N				1000 ppm-N
	1	2	3		1	2	3			1	2	3		1	2	3
0	0.099	0.103	0.098	0	0.124	0.125	0.12		0				0
24	0.107	0.114	0.116	24	0.141	0.132	0.144		24				24
46	0.106	0.124	0.126	46	0.146	0.149	0.142		46				46
70	0.114	0.116	0.138	70	0.152	0.148	0.154		70	0.114	0.116	0.138	70
78	0.131	0.146	0.169	78					78	0.131	0.146	0.169	78
96	0.167	0.192	0.196	96	0.172	0.173	0.198		96	0.167	0.192	0.196	96
120	0.207	0.196	0.22	120	0.198	0.192	0.259		120				120
144	0.213	0.209	0.2	144	0.245	0.273	0.343						144		0.273	0.343
168	0.202	0.191	0.207	168	0.307	0.391	0.484						168	0.307	0.391	0.484
				192	0.547	0.296	0.55						192	0.547
				220	0.607	0.382	0.635			0.0029	0.0021	0.002	220	0.607
				288	0.69	0.556	0.711
				360	0.578	0.648	0.628
														0.0057	0.0049	0.0059
[truncated: 1 more columns]

## Sheet: Fig 1 NL23 panels C-D
Determination of the NO3 reduction rates
	Measurement by Ionic chromatography. Values are in ppm (mg/L) of the ion nitrate or nitrite
Initial NO3	Nitrate		ppm-NO3
Concentration	Sample	t0	t1	t2	t3	t4	t5	t6	t7	t8	t9
mg-N/L	Time (h)	0	24	48	72	96	120	144	168	192	216
28	Rep1	155.07	143.789	70.206	10.334	0	0	0	9.22	0	0
	Rep2	261.406	250.326	172.813	0	0	0	0	0	0	0
	Rep3	170.262	136.274	98.762	0	0	0	0	0	5.775	0
	Average	195.579	176.796	113.927	3.44467	0	0	0	3.07333	1.925	0
	SD	57.5114	63.7893	52.9578	5.96634	0	0	0	5.32317	3.3342	0
70	Rep1	382.97	366.964	281.645	174.915	0	0	0	5.522	0	0
	Rep2	460.493	431.453	410.749	302.592	50.31	0	0	0	0	9.197
	Rep3	425.246	557.298	554.096	237.211	0	0	0	0	0	0
	Average	422.903	451.905	415.497	238.239	16.77	0	0	1.84067	0	3.06567
	SD	38.8146	96.8012	136.288	63.8447	29.0465	0	0	3.18813	0	5.30989
140	Rep1	577.51	592.98	580.87	450.78	228.56	0	0	0	0	0
	Rep2	543.32	586.61	563	438.17	272.79	0	0	0	7.201	0
	Rep3	689.38	575.16	566.75	392.79	223	0	0	0	0	0
	Average	603.403	584.917	570.207	427.247	241.45	0	0	0	2.40033	0
	SD	76.3952	9.02987	9.42314	30.4992	27.2832	0	0	0	4.1575	0
200	Rep1	719.1	735.27	648.31	12.182	0	0	0	0	0	0
	Rep2	718	750.72	635.83	65.264	0	0	9.445	0	0	0
	Rep3	773.97	740.36	577.76	22.732	0	0	0	0	0	0
	Average	737.023	742.117	620.633	33.3927	0	0	3.14833	0	0	0
	SD	32.0015	7.87337	37.6501	28.1009	0	0	5.45307	0	0	0
280	Rep1	1194	1151.8	1159.9	1007.6	511.69	0	6.756	0	0	0
	Rep2	1149.7	1136.8	1038.9	1081.3	925.44	296.8	0	0	7.201	0
	Rep3	1163.6	1148.4	1103	1060.3	785.56	0	0	0	0	0
	Average	1169.1	1145.67	1100.6	1049.73	740.897	98.9333	2.252	0	2.40033	0				The values in yellow were used to determine the slope, which corresponds to the rate
	SD	22.6563	7.86469	60.5357	37.9692	210.46	171.358	3.90058	0	4.1575	0
350	Rep1	1491	1370	1598.7	1480.3	1321.4	590.62	0	0	0	7.621
	Rep2	1563.1	1443.5	1423.2	1262.9	1103.5	101.04	0	0	0	0
	Rep3	1542.3	1532.8	1483.7	1488.8	1015	39.616	6.612	0	0	0
	Average	1532.13	1448.77	1501.87	1410.67	1146.63	243.759	2.204	0	0	2.54033
	SD	37.1096	81.5277	89.1492	128.04	157.688	301.957	3.81744	0	0	4.39999
500	Rep1	1817.4	1857.5	1462.1	999.47	0	0	0	0	0	0
	Rep2	1635.6	1810.1	1684	793.92	0	0	0	0	0	0
	Rep3	1937.7	1745.2	1546.7	876.87	0	0	0	0	0	0
	Average	1796.9	1804.27	1564.27	890.087	0	0	0	0	0	0
	SD	152.09	56.3768	111.988	103.41	0	0	0	0	0	0
560	Rep1	2128.4	2233.6	2294.2	1972.5	1844.3	539.43	0	0	0	7.244
	Rep2	2369.6	2402.9	2165.9	2220.1	1966.9	226.91	0	7.494	0	8.588
	Rep3	2367.9	2366	2295.7	2061.6	1894	0	0	0	6.543	6.881
	Average	2288.63	2334.17	2251.93	2084.73	1901.73	255.447	0	2.498	2.181	7.571
	SD	138.769	89.0261	74.5108	125.411	61.6648	270.845	0	4.32666	3.7776	0.899255
														Specific NO3
	Conversion in ppm of N equivalent													reduction		Specific NO3
	Nitrate		ppm-N		ppm-NO3*100/443								NO3 reduction	rates	NO3 reduction	reduction
	Sample	t0	t1	t2	t3	t4	t5	t6	t7	t8	t9	Culture OD*	rates (from graph)	ppm-N h-1	rates	rates
mg-N/L	Time (h)	0	24	48	72	96	120	144	168	192	216		ppm-N h-1	OD-1	mM h-1	mM h-1 OD-1
28	Rep1	35.0045	32.458	15.8479	2.33273	0	0	0	2.08126	0	0	0.112	0.6276	5.60357	0.0448106	0.400095
	Rep2	59.0081	56.507	39.0097	0	0	0	0	0	0	0	0.123	1.1772	9.57073	0.0840521	0.68335
	Rep3	38.4339	30.7616	22.2939	0	0	0	0	0	1.30361	0	0.118	0.6409	5.43136	0.0457603	0.387799
	Average	44.1488	39.9089	25.7172	0.777577	0	0	0	0.693755	0.434537	0		0.815233	6.86855	0.0582077	0.490415
	SD	12.9823	14.3994	11.9544	1.3468	0	0	0	1.20162	0.752641	0		0.313543	2.34174	0.022387	0.1672
70	Rep1	86.4492	82.8361	63.5767	39.4842	0	0	0	1.2465	0	0	0.141	1.1358	8.05532	0.0810961	0.57515
	Rep2	103.949	97.3935	92.7199	68.3052	11.3567	0	0	0	0	2.07607	0.133	1.1772	8.85113	0.0840521	0.631971
	Rep3	95.9923	125.801	125.078	53.5465	0	0	0	0	0	0	0.151	1.8706	12.3881	0.133561	0.884509
	Average	95.4634	102.01	93.7916	53.7786	3.78555	0	0	0.4155	0	0.692024		1.39453	9.76484	0.0995697	0.69721
	SD	8.76175	21.8513	30.7647	14.4119	6.55677	0	0	0.719668	0	1.19862		0.412805	2.30637	0.0294743	0.164675
140	Rep1	130.363	133.856	131.122	101.756	51.5937	0	0	0	0	0	0.22	1.7589	7.995	0.125585	0.570843
	Rep2	122.646	132.418	127.088	98.9097	61.5779	0	0	0	1.62551	0	0.189	1.7441	9.22804	0.124529	0.658882
	Rep3	155.616	129.833	127.935	88.6659	50.3386	0	0	0	0	0	0.176	1.848	10.5	0.131947	0.7497
	Average	136.208	132.035	128.715	96.4439	54.5034	0	0	0	0.541836	0		1.78367	9.24101	0.127354	0.659808
	SD	17.245	2.03835	2.12712	6.88469	6.15874	0	0	0	0.938487	0		0.0562036	1.25255	0.00401294	0.0894321
200	Rep1	162.325	165.975	146.345	2.74989	0	0	0	0	0	0	0.484	2.673	5.52273	0.190852	0.394323
	Rep2	162.077	169.463	143.528	14.7323	0	0	2.13205	0	0	0	0.47	2.6549	5.64872	0.18956	0.403319
	Rep3	174.711	167.124	130.42	5.13138	0	0	0	0	0	0	0.514	2.6111	5.07996	0.186433	0.362709
	Average	166.371	167.521	140.098	7.53785	0	0	0.710685	0	0	0		2.64633	5.41714	0.188948	0.386784
	SD	7.22381	1.77729	8.49889	6.34332	0	0	1.23094	0	0	0		0.0318268	0.298722	0.00227243	0.0213287
280	Rep1	269.526	260	261.828	227.449	115.506	0	1.52506	0	0	0	0.341	3.3053	9.69296	0.235998	0.692077
	Rep2	259.526	256.614	234.515	244.086	208.903	66.9977	0	0	1.62551	0	0.298	3.6423	12.2225	0.26006	0.872685
	Rep3	262.664	259.233	248.984	239.345	177.327	0	0	0	0	0	0.312	3.7307	11.9574	0.266372	0.853756
	Average	263.905	258.616	248.442	236.96	167.245	22.3326	0.508352	0	0.541836	0		3.55943	11.2909	0.254144	0.806173
	SD	5.1143	1.77532	13.6649	8.57093	47.5079	38.6812	0.880492	0	0.938487	0		0.22448	1.39022	0.0160279	0.0992619
350	Rep1	336.569	309.255	360.88	334.153	298.284	133.323	0	0	0	1.72032	0.382	4.8643	12.7338	0.347311	0.909191
	Rep2	352.844	325.847	321.264	285.079	249.097	22.8081	0	0	0	0	0.348	4.5064	12.9494	0.321757	0.924589
	Rep3	348.149	346.005	334.921	336.072	229.12	8.94266	1.49255	0	0	0	0.353	5.0997	14.4467	0.364119	1.0315
	Average	345.854	327.035	339.022	318.435	258.834	55.0245	0.497517	0	0	0.573439		4.82347	13.3766	0.344396	0.955093
	SD	8.37689	18.4035	20.124	28.903	35.5956	68.1618	0.861725	0	0	0.993225		0.29875	0.932983	0.0213308	0.066615
500	Rep1	410.248	419.3	330.045	225.614	0	0	0	0	0	0	0.692	6.8759	9.93627	0.490939	0.70945
	Rep2	369.21	408.6	380.135	179.214	0	0	0	0	0	0	0.666	7.9195	11.8911	0.565452	0.849027
	Rep3	437.404	393.95	349.142	197.939	0	0	0	0	0	0	0.67	7.2738	10.8564	0.519349	0.775148
	Average	405.621	407.284	353.108	200.922	0	0	0	0	0	0		7.3564	10.8946	0.525247	0.777875
	SD	34.3318	12.7261	25.2795	23.3432	0	0	0	0	0	0		0.52668	0.977994	0.037605	0.0698288
560	Rep1	480.451	504.199	517.878	445.26	416.321	121.767	0	0	0	1.63521	0.433	6.7394	15.5644	0.481193	1.1113
	Rep2	534.898	542.415	488.916	501.151	443.995	51.2212	0	1.69165	0	1.9386	0.444	9.3735	21.1115	0.669268	1.50736
	Rep3	534.515	534.086	518.217	465.372	427.54	0	0	0	1.47698	1.55327	0.435	9.6953	22.288	0.692244	1.59137
	Average	516.622	526.9	508.337	470.594	429.285	57.6629	0	0.563883	0.492325	1.70903		8.60273	19.6547	0.614235	1.40334
	SD	31.3248	20.0962	16.8196	28.3094	13.9198	61.1388	0	0.976673	0.852732	0.202992		1.6217	3.59075	0.115789	0.25638
												*Average OD at stationnary phase
													NO3 reduction rates		Specific NO3 reduction rates
											ppm-N	mM	mM h-1	SD	mM h-1/OD	SD
											28	1.9992	0.0582077	0.022387	0.490415	0.1672
											70	4.998	0.0995697	0.0294743	0.69721	0.164675
											140	9.996	0.127354	0.00401294	0.659808	0.0894321
											200	14.28	0.188948	0.00227243	0.386784	0.0213287
											280	19.992	0.254144	0.0160279	0.806173	0.0992619
											350	24.99	0.344396	0.0213308	0.955093	0.066615
											500	35.7	0.525247	0.037605	0.777875	0.0698288
											560	39.984	0.614235	0.115789	1.40334	0.25638

## Sheet: Fig 1 JAM1 panel B
Time (h)	22.6 ppm-N			Time (h)	56.6 ppm-N			Time (h)	113.1 ppm-N			Time (h)	169.7 ppm-N			Time (h)	339.4 ppm-N			Time (h)	565.6 ppm-N				Time (h)	226.2 ppm-N			Time (h)	452.5 ppm-N
	Rep1	Rep2	Rep3		Rep1	Rep2	Rep3		Rep1	Rep2	Rep3		Rep1	Rep2	Rep3		Rep1	Rep2	Rep3		Rep1	Rep2	Rep3			Rep1	Rep2	Rep3		Rep1	Rep2	Rep3
0	0.034	0.02	0.038	0	0.007	0.029	0.016	0	0.019	0.023	0.015	0	0.026	0.013	0.016	0	0.018	0.022	0.032	0	0.02	0.023	0.023		0	0.039	0.024	0.012	0	0.018	0.039	0.032
4	0.044	0.017	0.026	4	0.006	0.012	0.011	4	0.014	0.013	0.014	4	0.018	0.007	0.01	4	0.016	0.019	0.026	4	0.015	0.013	0.014		5	0.029	0.027	0.018	5	0.027	0.024	0.023
8	0.025	0.02	0.029	8	0.007	0.015	0.054	8	0.024	0.056	0.019	8	0.028	0.024	0.02	8	0.064	0.027	0.033	8	0.025	0.018	0.027		24	0.166	0.167	0.168	24	0.204	0.217	0.196
24	0.071	0.067	0.082	24	0.063	0.078	0.09	24	0.086	0.084	0.099	24	0.121	0.118	0.11	24	0.22	0.145	0.264	24	0.24	0.226	0.222		29	0.199	0.181	0.178	29	0.262	0.224	0.22
28	0.088	0.077	0.093	28	0.088	0.101	0.112	28	0.134	0.128	0.125	28	0.136	0.122	0.124	28	0.211	0.185	0.233	28	0.258	0.259	0.245		47	0.237	0.238	0.225	47	0.354	0.249	0.233
32	0.097	0.093	0.105	32	0.1	0.112	0.111	32	0.152	0.151	0.157	32	0.183	0.157	0.164	32	0.21	0.186	0.226	32	0.248	0.3	0.282
48	0.11	0.107	0.139	48		0.13	0.122	48	0.171	0.172	0.161	48	0.207	0.189	0.193	48	0.206	0.24	0.297	48	0.265	0.303	0.271
52	0.103	0.102	0.133	52		0.122	0.122	52	0.181	0.155	0.163	52	0.202	0.208	0.198	52	0.215	0.237	0.298	52	0.264	0.333	0.26
Time (h)	22.6 ppm-N			Time (h)	56.6 ppm-N				113.1 ppm-N			Time (h)	169.7 ppm-N			Time (h)	339.4 ppm-N				565.6 ppm-N				Time (h)	226.2 ppm-N			Time (h)	452.5 ppm-N
	Rep1	Rep2	Rep3		Rep1	Rep2	Rep3		Rep1	Rep2	Rep3		Rep1	Rep2	Rep3		Rep1	Rep2	Rep3		Rep1	Rep2	Rep3			Rep1	Rep2	Rep3		Rep1	Rep2	Rep3
0	0.034	0.02	0.038	0	0.007	0.029	0.016	0	0.019	0.023	0.015	0	0.026	0.013	0.016	0	0.018	0.022	0.032	0	0.02	0.023	0.023		0	0.039	0.024	0.012	0	0.018	0.039	0.032
4	0.044	0.017	0.026	4	0.006	0.012	0.011	4	0.014	0.013	0.014	4	0.018	0.007	0.01	4	0.016	0.019	0.026	4	0.015	0.013	0.014		5	0.029	0.027	0.018	5	0.027	0.024	0.023
8	0.025	0.02	0.029	8	0.007	0.015	0.054	8	0.024	0.056	0.019	8	0.028	0.024	0.02	8	0.064	0.027	0.033	8	0.025	0.018	0.027		24	0.166	0.167	0.168	24	0.204	0.217	0.196
24	0.071	0.067	0.082	24	0.063	0.078	0.09	24	0.086	0.084	0.099	24	0.121	0.118	0.11	24	0.22	0.145	0.264	24	0.24	0.226	0.222		29	0.199	0.181	0.178	29	0.262	0.224	0.22
28	0.088	0.077	0.093	28	0.088	0.101	0.112	28	0.134	0.128	0.125	28	0.136	0.122	0.124	28	0.211	0.185	0.233	28	0.258	0.259	0.245		47				47
32	0.097	0.093	0.105	32	0.1	0.112	0.111	32	0.152	0.151	0.157	32	0.183	0.157	0.164	32		0.186	0.226	32	0.248	0.3	0.282
48				48	0.115			48				48				48				48
52				52	0.129			52				52				52				52
Growth rates (from graph) OD h-1	0.0021	0.0024	0.0025	Rates	0.0031	0.0031	0.0033	Rates	0.0044	0.0039	0.0046	Rates	0.005	0.0048	0.0048	Rates	0.008	0.006	0.008	Rates	0.0089	0.0098	0.0091		Rates	0.006	0.006	0.0064	Rates	0.0073	0.0087	0.0075
Chanel Cinétique 7																						Growth rates OD h-1
	25	ppm-N		50	ppm-N		100	ppm-N		300	ppm-N		600	ppm-N			1000	ppm-N		ppm-N	mM	Rep1	Rep2	Rep3
0	0.032	0.01	0.032	0.004	0.035	0.033	0.013	0	0.03	0.008	0.053	0.009	0.016	0.012	0.026	0.009	0.037	0.016		22.6	1.61364	0.0021	0.0024	0.0025
6	0.063	0.019	0.023	0.015	0.001	0.04	0.084	0.041	0.03	0.004	0.033	0.008	0.072	0.077	0.016	0.012	0.008	0.015		25	1.785	0.0027	0.0033	0.0026
24	0.1	0.07	0.112	0.119	0.069	0.13	0.17	0.146	0.09	0.143	0.199	0.084	0.177	0.216	0.157	0.306	0.212	0.236		50	3.57	0.0043	0.005	0.002
48	0.144	0.102	0.175	0.106	0.115	0.13	0.145	0.134	0.161	0.187	0.214	0.134	0.436	0.239	0.19	0.319	0.251	0.27		56.6	4.04124	0.0031	0.0031	0.0033
72	0.152	0.125	0.17	0.102	0.101	0.177	0.227	0.153	0.147	0.194	0.209	0.141	0.453	0.291	0.198	0.333	0.293	0.266		100	7.14	0.0061	0.006	0.0027
																				113.1	8.07534	0.0044	0.0039	0.0046
																				169.7	12.1166	0.005	0.0048	0.0048
	25	ppm-N		50	ppm-N		100	ppm-N		300	ppm-N		600	ppm-N			1000	ppm-N		226.2	16.1507	0.006	0.006	0.0064
0	0.032	0.01	0.032	0.004	0.035	0.033	0.013	0	0.03	0.008	0.053	0.009	0.016	0.012		0.009	0.037	0.016		300	21.42	0.0034	0.0061	0.0068
6	0.063	0.019		0.015	0.001	0.04	0.084	0.041	0.03	0.004	0.033	0.008	0.072	0.077	0.016	0.012	0.008	0.015		339.4	24.2332	0.008	0.006	0.008
24	0.1	0.07	0.112	0.119	0.069	0.13	0.17	0.146	0.09	0.143	0.199	0.084	0.177	0.216	0.157	0.306	0.212	0.236		452.5	32.3085	0.0073	0.0087	0.0075
													0.436							565.6	40.3838	0.0089	0.0098	0.0091
																				600	42.84	0.0083	0.0065	0.0078
Growth rates (from graph) OD h-1	0.0027	0.0033	0.0026	0.0043	0.005	0.002	0.0061	0.006	0.0027	0.0068	0.0061	0.034	0.0083	0.0065	0.0078	0.0133	0.0099	0.0082		1000	71.4	0.0133	0.0099	0.0082

## Sheet: Fig.1 JAM1 panel B
													28 ppm-N										70 ppm-n						140 ppm-N						280 ppm-N						350 ppm-N						560 ppm-N
	OD											Time (h)	Rep1	Rep2	Rep3	Rep4	Rep5	Rep7	Rep8	Rep9		Time (h)	Rep1	Rep2	Rep3			Time (h)	Rep7	Rep8	Rep9			Time (h)	Rep7	Rep8	Rep9			Time (h)	Rep7	Rep8	Rep9			Time (h)	Rep7	Rep8	Rep9
	Sample	t0	t1	t2	t3	t4	t5	t6				0	0.062	0.042	0.048	0.031						0	0.038	0.031	0.04			0	0.059	0.061	0.057			0	0.051	0.062	0.047			0	0.058	0.053	0.048			0	0.057	0.049	0.051
mg-N/L	Time (h)	0	10	24	36	48	60	72				6										6						6	0.083	0.08	0.086			6	0.099	0.099	0.085			6	0.089	0.095	0.097			6	0.105	0.108	0.13
28	Rep1	0.062	0.079	0.075	0.095	0.103	0.088	0.171				10	0.079	0.058	0.069		0.03					10	0.072	0.07	0.067			10						10						10						10
	Rep2	0.042	0.058	0.056	0.084	0.089	0.086	0.148				12						0.043	0.035	0.042		12						12						12						12						12		0.182	0.197
	Rep3	0.048	0.069	0.08	0.129	0.086	0.097	0.158				24	0.075	0.056	0.08	0.062	0.058	0.056	0.049	0.05		24	0.086	0.086	0.087			24	0.141	0.136	0.14			24	0.245	0.24	0.22			24	0.22	0.193	0.208			24	0.25	0.249
	Average	0.0506667	0.0686667	0.0703333	0.102667	0.0926667	0.0903333	0.159				30						0.068	0.058	0.053		30						30	0.151	0.145	0.156			30						30	0.277	0.225	0.255			30	0.301		0.293
	SD	0.0102632	0.010504	0.0126623	0.0234592	0.00907377	0.00585947	0.0115326				36	0.095	0.084	0.129	0.07	0.066	0.085	0.07	0.071		36	0.113	0.112	0.124			36						36						36		0.254				36
70	Rep1	0.038	0.072	0.086	0.113	0.121	0.132	0.205				48	0.103	0.089		0.081	0.082	0.093	0.082	0.085		48	0.121	0.124				48						48						48						48
	Rep2	0.031	0.07	0.086	0.112	0.124	0.129	0.194				56						0.107	0.096	0.097		56						56						56						56						56
	Rep3	0.04	0.067	0.087	0.124	0.12	0.141	0.18				58				0.103						58						58						58						58						58
	Average	0.0363333	0.0696667	0.0863333	0.116333	0.121667	0.134	0.193				60										60						60						60						60						60
	SD	0.00472582	0.00251661	0.00057735	0.00665833	0.00208167	0.006245	0.01253				72	0.171	0.148	0.158							72	0.205	0.194	0.18			72						72						72						72
												75						0.136	0.13	0.13		75						75						75						75						75
	17 mai 2017.											Growth rate OD h-1	0.0014	0.0014	0.0016	0.0012	0.0013	0.0015	0.0015	0.0015			0.0021	0.0021	0.0019				0.0031	0.0029	0.0032				0.0085	0.0075	0.0073				0.0073	0.0055	0.0067				0.0081	0.0084	0.0077
	OD
	Sample	t0	t1	t2	t3	t4	t5	t6
mg-N/L	Time (h)	0	10	24	36	48	58	72
28	Rep1	0.031	0.068	0.062	0.07	0.081	0.103	0.065
	Rep2	0.045	0.03	0.058	0.066	0.082	0.075	0.083
	Average	0.038	0.049	0.06	0.068	0.0815	0.089	0.074
	SD	0.00989949	0.0268701	0.00282843	0.00282843	0.000707107	0.019799	0.0127279
	20 mai 2017.
	OD
	Sample	t0	t1	t2	t3	t4	t5	t6	t7	t8
mg-N/L	Time (h)	0	6	12	24	30	36	48	56	75
28	Rep1	0.057	0.063	0.043	0.056	0.068	0.085	0.093	0.107	0.136
	Rep2	0.057	0.051	0.035	0.049	0.058	0.07	0.082	0.096	0.13
	Rep3	0.054	0.057	0.042	0.05	0.053	0.071	0.085	0.097	0.13
	Average	0.056	0.057	0.04	0.0516667	0.0596667	0.0753333	0.0866667	0.1	0.132
	SD	0.00173205	0.006	0.0043589	0.00378594	0.00763763	0.0083865	0.00568624	0.00608276	0.0034641
140	Rep1	0.059	0.083	0.193	0.141	0.151	0.154	0.153	0.154	0.159
	Rep2	0.061	0.08	0.21	0.136	0.145	0.151	0.149	0.15	0.163
	Rep3	0.057	0.086	0.2	0.14	0.156	0.153	0.145	0.16	0.155
	Average	0.059	0.083	0.201	0.139	0.150667	0.152667	0.149	0.154667	0.159
	SD	0.002	0.003	0.008544	0.00264575	0.00550757	0.00152753	0.004	0.00503322	0.004
280	Rep1	0.051	0.099	0.19	0.245	0.261	0.229	0.244	0.254	0.236
	Rep2	0.062	0.099	0.211	0.24	0.245	0.24	0.229	0.244	0.243
	Rep3	0.047	0.085	0.223	0.22	0.242	0.226	0.248	0.228	0.258
	Average	0.0533333	0.0943333	0.208	0.235	0.249333	0.231667	0.240333	0.242	0.245667
	SD	0.00776745	0.0080829	0.0167033	0.0132288	0.0102144	0.00737111	0.0100167	0.0131149	0.0112398
350	Rep1	0.058	0.089	0.173	0.22	0.277	0.259	0.236	0.236	0.238
	Rep2	0.053	0.095	0.178	0.193	0.225	0.254	0.225	0.225	0.24
	Rep3	0.048	0.097	0.184	0.208	0.255	0.251	0.264	0.239	0.249
	Average	0.053	0.0936667	0.178333	0.207	0.252333	0.254667	0.241667	0.233333	0.242333
	SD	0.005	0.00416333	0.00550757	0.0135277	0.0261024	0.00404145	0.020108	0.00737111	0.00585947
560	Rep1	0.057	0.105	0.2	0.25	0.301	0.301	0.299	0.279	0.284
	Rep2	0.049	0.108	0.182	0.249	0.271	0.308	0.295	0.289	0.296
	Rep3	0.051	0.13	0.197	0.232	0.293	0.31	0.296	0.303	0.293
	Average	0.0523333	0.114333	0.193	0.243667	0.288333	0.306333	0.296667	0.290333	0.291
	SD	0.00416333	0.0136504	0.00964365	0.010116	0.0155349	0.00472582	0.00208167	0.0120554	0.006245
	OD
	Sample	t0	t1	t2	t3	t4	t5	t6	t7	t8
mg-N/L	Time (h)	0	6	12	24	30	36	48	56	72
100	Rep1	0.045	0.105	0.148	0.132	0.12	0.139	0.152	0.147	0.156
	Rep2	0.045	0.104	0.146	0.128	0.117	0.142	0.141	0.146	0.142
	Rep3	0.046	0.106	0.157	0.134	0.13	0.134	0.152	0.16	0.158
	Average	0.0453333	0.105	0.150333	0.131333	0.122333	0.138333	0.148333	0.151	0.152
	SD	0.00057735	0.001	0.00585947	0.00305505	0.00680686	0.00404145	0.00635085	0.00781025	0.0087178
200	Rep1	0.063	0.126	0.223	0.251	0.247	0.256	0.253	0.249	0.233
	Rep2	0.051	0.121	0.203	0.255	0.24	0.238	0.247	0.224	0.206
	Rep3	0.054	0.123	0.229	0.245	0.243	0.27	0.251	0.257	0.238
	Average	0.056	0.123333	0.218333	0.250333	0.243333	0.254667	0.250333	0.243333	0.225667
	SD	0.006245	0.00251661	0.0136137	0.00503322	0.00351188	0.0160416	0.00305505	0.0172143	0.0172143
Blanc	Rep1	0		0.001		0.003		0.009		0.015
	Rep2	0		0.003		0.002		0.008		0.013
	Rep3	0		0.002		0.003		0.01		0.009
	Average	0		0.002		0.00266667		0.009		0.0123333
	SD	0		0.001		0.00057735		0.001		0.00305505

## Sheet: Fig 1 JAM1 panel C-D
			OD							Average OD at stationary phase
Sample	mM	Time (h)	0	20	27	44	51	71	120
Rep1		triplicat	0.017	0.097	0.104	0.13		0.163	0.157	0.1385
Rep2			0.009	0.081	0.105	0.114		0.152	0.11	0.12025
Rep3			0.014	0.087	0.112	0.129		0.161	0.11	0.128
		Average	0.0133333	0.0883333	0.107	0.124333		0.158667	0.125667
	9.639	SD	0.00404145	0.0080829	0.0043589	0.00896289		0.00585947	0.0271355
Rep1		triplicat	0.013	0.056	0.106	0.112		0.126	0.148	0.123
Rep2			0.008	0.11	0.14	0.13		0.151	0.111	0.133
Rep3			0.012	0.103	0.144	0.141		0.159	0.156	0.15
		Average	0.011	0.0896667	0.13	0.127667		0.145333	0.138333
	16.065	SD	0.00264575	0.0293655	0.0208806	0.0146401		0.0172143	0.0240069
Rep1		triplicat	-0.014	0.094	0.148	0.143		0.165	0.132	0.147
Rep2			0.012	0.094	0.155	0.159		0.15	0.143	0.15175
Rep3			0.009	0.076	0.141	0.143		0.153	0.124	0.14025
		Average	0.00233333	0.088	0.148	0.148333		0.156	0.133
	24.276	SD	0.0142244	0.0103923	0.007	0.0092376		0.00793725	0.00953939
Rep1		triplicat	0.008	0.14	0.176	0.175		0.185	0.185	0.18025
Rep2			0.007	0.123	0.172	0.183		0.185	0.177	0.17925
Rep3			0.004	0.102	0.185	0.209		0.241	0.177	0.203
		Average	0.00633333	0.121667	0.177667	0.189		0.203667	0.179667
	32.13	SD	0.00208167	0.0190351	0.00665833	0.0177764		0.0323316	0.0046188
Rep1		triplicat	-0.002	0.094	0.171	0.197	0.211	0.23	0.173	0.1964
Rep2			0.003	0.113	0.201	0.218	0.214	0.247	0.194	0.2148
Rep3			0.014	0.075	0.167	0.239	0.244	0.255	0.228	0.2266
		Average	0.005	0.094	0.179667	0.218	0.223	0.244	0.198333
	42.84	SD	0.00818535	0.019	0.0185831	0.021	0.0182483	0.0127671	0.0277549
Rep1		triplicat	-0.001	0.095	0.162	0.196	0.191	0.211	0.197	0.1914
Rep2			0.017	0.13	0.176	0.219	0.189	0.219	0.178	0.1962
Rep3			0.02	0.128	0.197	0.224	0.214	0.233	0.207	0.215
		Average	0.012	0.117667	0.178333	0.213	0.198	0.221	0.194
	71.4	SD	0.0113578	0.0196554	0.0176163	0.0149332	0.0138924	0.0111355	0.0147309
Rep1		triplicat	0.008	0.108	0.175	0.196	0.173	0.193	0.135	0.1744
Rep2			0.03	0.071	0.126	0.417	0.321	0.35	0.288	0.3004
Rep3			0.003	0.128	0.172	0.205	0.214	0.229	0.15	0.194
		Average	0.0136667	0.102333	0.157667	0.272667	0.236	0.257333	0.191
	107.1	SD	0.0143643	0.0289194	0.0274651	0.125077	0.0764133	0.0822456	0.0843386
Rep1		triplicat	0.004	0.112	0.125	0.131	0.141	0.149	0.1	0.1292
Rep2			0.001	0.104	0.134	0.132	0.131	0.155	0.104	0.1312
Rep3			0.017	0.123	0.139	0.146	0.137	0.159	0.094	0.135
		Average	0.00733333	0.113	0.132667	0.136333	0.136333	0.154333	0.0993333
	142.8	SD	0.0085049	0.00953939	0.0070946	0.0083865	0.00503322	0.00503322	0.00503322
Sample	mM	Time (h)	0	20	27	44	51	71	120			264		9.6 mM
Rep1	9.63223	triplicat	9.25987	0.606936	0.307323	0	0.672481		0			0		0.432647
Rep2			9.23256	0.511028	0	0	0		0			0		0.436076
Rep3			9.39915	0.308287	0	0.326601	0.537214		0			0		0.454543
Rep1	16.066	triplicat	15.5932	4.16565	0.309412	0.358571	0		0			0
Rep2			16.3858	3.20818	0	0	0.418172		0			0
Rep3			16.6782	2.29906	0.260574	0.281459	0		0			0
Rep1	24.094	triplicat	22.2417	6.15884	0.850642	0.341381	0		0			0
Rep2			20.8259	7.70477	1.26335	0.314874	0.651114		0			0
Rep3			21.9053	9.74166	1.37436	0.307966	0		0			0
Rep1	32.122	triplicat	28.0688	14.0156	6.62472	1.41436	0.350378		0			0
Rep2			28.539	13.7765	7.14684	1.01177	0.421224		0			0
Rep3			31.2456	14.2047	6.41026	0.82558	0		0			0
Rep1	42.6699	triplicat	36.5949	23.5686	15.2481	3.5147	1.35814	0.385881	0			0
Rep2			38.6349	22.2256	12.8642	3.32738	1.32488	0	0			0
Rep3			36.2181	25.5867	16.1771	3.83536	1.55847	0	0			0
Rep1	71.1066	triplicat	59.7502	46.9541	39.9556		22.5607	11.4556	8.14495			9.63675
Rep2			59.7599	46.5323	39.9263	24.9364	24.0888	15.318	13.269			12.7238
Rep3			72.4159	49.0098	40.7042	25.5128	24.1653	14.6979	11.8293			12.4536
Rep1	106.665	triplicat	95.1793	77.6046	72.8357	57.1038	59.6611	48.8177	43.1302			47.2792
Rep2			96.3418	76.8807	70.7493	50.5016	52.7798	41.4732	37.4996			39.3536
Rep3			96.9471	83.0127	73.2116	58.1935	60.9233	46.7376	36.8234			43.976
Rep1	142.223	triplicat	150.368	127.848	134.244	112.068	129.333	110.72	85.7543			104.537
Rep2			150.564	125.946	130.32	112.92	134.644	115.834	85.6952			99.7836
Rep3			144.466	128.689	119.775	110.048	122.586	108.734	91.2987			100.864
	NO3	NO3 reduction rate mM h-1
	mM	Rep1	Rep2	Rep3
	9.63223	0.432647	0.436076	0.454543
	16.066	0.6325	0.6184	0.5672
	24.094	0.7949	0.7268	0.7094
	32.122	0.774	0.7803	0.9049
	42.6699	0.7619	0.748	0.819
	71.1066	0.9632	0.7921	0.7355
	106.665	0.8603	0.8907	1.0348
	142.223	0.7971	0.8226	0.8248
	NO3	Average OD at stationary phase
	mM	Rep1	Rep2	Rep3
	9.63223	0.1385	0.12025	0.128
	16.066	0.123	0.133	0.15
	24.094	0.147	0.15175	0.14025
	32.122	0.18025	0.17925	0.203
	42.6699	0.1964	0.2148	0.2266
	71.1066	0.1914	0.1962	0.215
	106.665	0.1744	0.3004	0.194
	142.223	0.1292	0.1312	0.135
		specific reduction NO3 reduction
	NO3	rate mM h-1 OD-1
	mM	Rep1	Rep2	Rep3
	9.63223	3.1238	3.62641	3.55112
	16.066	5.14228	4.64962	3.78133
	24.094	5.40748	4.78946	5.05811
	32.122	4.29404	4.35314	4.45764
	42.6699	3.87933	3.48231	3.6143
	71.1066	5.03239	4.03721	3.42093
	106.665	4.93291	2.96505	5.33402
	142.223	6.1695	6.26982	6.10963

## Sheet: Figure 2
Panel A: Pure cultures, strain NL23 denitrification pathway not stimulated
																					Pure culture JAM1 NO3
Time (h)	JAM1 NO3- mM			NL23 NO3- mM			JAM1 NO2- mM			NL23 NO2- mM			JAM1 Growth OD600 nm			NL23 Growth OD600 nm						Values in ppm-N			rates
0	20.2062	20.9202	21.42	22.5624	22.2054	21.4914	2.4276	1.785	1.785	0	0	0	0.17	0.163	0.18	0.174	0.175	0.18			Time (h)	0	8	24	ppm-N/h	mM/h
8	12.6378	13.8516	13.4946	22.0626	22.2768	21.7056	10.353	11.3526	9.7818	0	0	0	0.267	0.286	0.289	0.257	0.261	0.265			rep1	283.16	176.698	12.2962	11.304	0.807106
24	0.8568	1.428	0.9996	21.777	21.777	21.8484	23.0622	23.0622	22.9908	0.357	0.6426	0.5712	0.314	0.292	0.287	0.374	0.396	0.385			rep2	293.217	193.871	20.1406	11.782	0.841235
48	0	0	0	21.1344	21.9198	21.3486	22.7052	23.4192	22.9908	0	0	0	0.324	0.3	0.328	0.429	0.416	0.413			rep3	299.634	189.176	13.6156	11.142	0.795539
72	0	0	0	18.3498	19.278	18.9924	22.4196	22.4196	22.491	0	0	0	0.38	0.357	0.361	0.559	0.522	0.507							11.4093	0.814626	Average
96	0	0	0	0.4284	0	0.357	21.8484	20.706	21.7056	0	0	0	0.374	0.356	0.361	0.825	0.792	0.876							0.332748	0.0237582	SD
120													0.363	0.365	0.365	1.472	1.415	1.462
144													0.399	0.353	0.345	1.505	1.433	1.44
Panel B: Co-cultures, strain NL23 denitrification pathway not stimulated											Cocultures NO3
													Values in ppm-N			rates
Time (h)	NO3- mM			NO2- mM			Growth OD600 nm					Time (h)	0	8	24	ppm-N/h	mM/h
0	22.134	22.848	22.2054	0.714	0.6426	1.428	0.183	0.186	0.186			rep1	310.033	265.616	89.674	9.3513	0.667683
8	18.9924	18.6354	18.564	4.4982	4.4982	4.7838	0.349	0.338	0.355			rep2	320.251	261.089	98.9488	9.4409	0.67408
24	6.426	7.0686	6.1404	16.9218	17.0646	17.85	0.443	0.416	0.414			rep3	310.629	260.218	86.2361	9.5674	0.683112
48	0.4998	0	0	22.7766	23.1336	23.0622	0.417	0.405	0.424							9.4532	0.674958
72	0	0	0	22.491	22.7766	22.6338	0.444	0.449	0.433							0.108574	0.00775217
96	0	0	0	21.6342	21.777	22.0626	0.451	0.431	0.467
120							0.44	0.454	0.446
144							0.485	0.439	0.447
Panel D: Pure cultures, strain NL23 denitrification pathway stimulated
																										Pure culture NL23 NOx									Pure culture JAM1 NO3
Time (h)	JAM1 NO3- mM			Time (h)	NL23 NO3- mM			Time (h)	JAM1 NO2- mM			Time (h)	NL23 NO2- mM			Time (h)	JAM1 Growth OD600 nm			Time (h)	NL23 Growth OD600 nm						values in ppm-N				rates				values in ppm-N				rates
0	23.6334	25.0614	24.5616	0	30.702	30.1308	28.8456	0	7.2114	7.0686	6.3546	0	0	0	0	0	0.134	0.141	0.16	0	0.1	0.138	0.132			Time (h)	0	24	48	72	ppm-N/h	mM/h			Time (h)	0	10	24	ppm-N/h	mM/h
10	8.8536	10.2816	9.4962	24	24.4902	22.6338	21.1344	5	13.1376	11.6382	13.1376	24	0	0	2.3562	10	0.208	0.213	0.22	24	0.394	0.368	0.371			rep1	430.269	342.684	140.685	0	6.22	0.444108			rep1	330.691	124.006	0	13.463	0.961258
24	1.785	0	0	48	10.0674	8.7822	9.8532	24	20.4204	20.4918	18.207	48	0	0	0	24	0.347	0.362	0.3	48	0.513	0.564	0.528			rep2	421.592	316.638	123.456	0	6.0748	0.433741			rep2	350.943	143.987	0	14.008	1.00017
48	0	0	0	72	0	0	0	30	16.779	16.1364	17.7072	72	0	0	0	48	0.374	0.36	0.331	72	0.619	0.615	0.605			rep3	404.168	295.607	138.137	0	5.7082	0.407565			rep3	343.616	133.098	0	14.344	1.02416
68	1.7136	0	0					48	13.209	14.637	15.4938					68	0.402	0.387	0.44	96	0.628	0.62	0.615								6.001	0.428471	Average						13.9383	0.995197	Average
								72	13.6374	13.8516	13.0662					96	0.436	0.452	0.429												0.263761	0.0188325	SD						0.444613	0.0317453	SD
Panel E: Co-cultures, strain NL23 denitrification pathway stimulated													Cocultures NOx							Cocultures NO3
Time (h)	NO3- mM			Time (h)	NO2- mM			Time (h)	Growth OD600 nm					Values in ppm-N			rates				Values in ppm-N			rates						NL23 vs co-cultures
0	30.345	30.6306	28.1316	0	0	0	0	0	0.131	0.137	0.118		Time (h)	0	24	30	ppm-N/h	mM/h		Time (h)	0	10	24	ppm-N/h	mM/h					Table Analyzed			Data 1
10	7.5684	7.14	6.7116	5	0	0	0	10	0.231	0.241	0.253		rep1	424.761	177.796	20.095	12.453	0.889144		rep1	424.761	106.04	24.806	17.184	1.22694					Column A			A
24	0	0	0	24	12.7092	12.0666	9.7104	24	0.427	0.425	0.449		rep2	429	169.147	0	12.575	0.897855		rep2	429	99.541	0	15.967	1.14004					vs			vs
48	1.9278	0	0	30	1.428	0	0	48	0.559	0.579	0.587		rep3	393.851	135.519	0	13.308	0.950191		rep3	393.851	93.98	0	15.788	1.12726					Column B			B
68	0	0	0	48	0	0	0	68	0.648	0.639	0.663						12.7787	0.912397	Average					16.313	1.16475	Average
				72	0	0	0	96	0.656	0.643	0.651						0.462457	0.0330194	SD					0.759599	0.0542354	SD				Paired t test
																														P value			0.0038
																														P value summary			**
																														Are means signif. different? (P < 0.05)			Yes
																														One- or two-tailed P value?			Two-tailed
																														t, df			t=16.25 df=2
																														Number of pairs			3
																														How big is the difference?
																														Mean of differences			-6.779
																														95% confidence interval			-8.574 to -4.984
																														R squared			0.9925
Panel C: qPCR on Co-cultures with strain NL23 denitrification pathway not stimulated
	Volume Culture mL	Volume total ADN µL	nanodrop [ng/ul]	Total (ng)	ADN/qPCR ng	narG1 cp/reaction	cp/10 mL	cp/ml	Average cp/mL	Average cp/mL	SE				Column A						JAM1
Coculture-1	10	100	43.2	4320	100	106000000	4579200000	457920000	475200000						vs						vs
Coculture-1	10	100	43.2	4320	100	114000000	4924800000	492480000							Column B						NL23
Coculture-2	10	100	40.7	4070	100	113000000	4.5991e+09	4.5991e+08	4.5991e+08	6.00197e+08	1.76856e+08
Coculture-2	10	100	40.7	4070	100	113000000	4.5991e+09	4.5991e+08							Unpaired t test with Welch's correction
Coculture-3	10	100	61.6	6160	100	143000000	8808800000	880880000	865480000						P value						P<0.0001
Coculture-3	10	100	61.6	6160	100	138000000	8500800000	850080000							P value summary						***
															Are means signif. different? (P < 0.05)						Yes
						napA									One- or two-tailed P value?						Two-tailed
Coculture-1	10	100	43.2	4320	100	2020000	87264000	8726400	9115200						Welch-corrected t, df						t=9.104 df=43
Coculture-1	10	100	43.2	4320	100	2200000	95040000	9504000
Coculture-2	10	100	40.7	4070	100	1540000	6.2678e+07	6.2678e+06	6.3899e+06	1.2468e+07	6.28722e+06				How big is the difference?
Coculture-2	10	100	40.7	4070	100	1600000	6.512e+07	6.512e+06							Mean ± SEM of column A						0.7451 ± 0.03181 N=24
Coculture-3	10	100	61.6	6160	100	3830000	235928000	23592800	21898800						Mean ± SEM of column B						0.2765 ± 0.04046 N=24
Coculture-3	10	100	61.6	6160	100	3280000	202048000	20204800							Difference between means						0.4685 ± 0.05147
															95% confidence interval						0.3647 to 0.5724
								Total JAM1 + NL23							R squared						0.6584
								Coculture-1	484315200
								Coculture-2	4.663e+08	6.12665e+08	1.83143e+08				F test to compare variances
								Coculture-3	887378800						F,DFn, Dfd						1.617, 23, 23
															P value						0.2565
	Two qPCR assays were performed per replicate.														P value summary						ns
															Are variances significantly different?						No
Panel F: qPCR on Co-cultures with strain NL23 denitrification pathway stimulated
	Volume Culture mL	Volume total ADN µL	nanodrop [ng/ul]	Total (ng)	ADN/qPCR ng	narG1 cp/reaction	cp/10 mL	cp/ml	Average cp/mL	Average cp/mL	SE				Column C						JAM1 spec
COCULT-1	10	100	192	19200	100	74900000	14380800000	1438080000	1451520000						vs						vs
COCULT-1	10	100	192	19200	100	76300000	14649600000	1464960000							Column D						NL23 spec
COCULT-2	10	100	196.3	19630	100	74700000	14663610000	1466361000	1466361000	1.50922e+09	6.70409e+07
COCULT-2	10	100	196.3	19630	100	74700000	14663610000	1466361000							Unpaired t test with Welch's correction
COCULT-3	10	100	228.5	22850	100	72900000	16657650000	1665765000	1609782500						P value						P<0.0001
COCULT-3	10	100	228.5	22850	100	68000000	15538000000	1553800000							P value summary						***
															Are means signif. different? (P < 0.05)						Yes
						napA									One- or two-tailed P value?						Two-tailed
COCULT-1	10	100	192	19200	100	17500000	3360000000	336000000	337920000						Welch-corrected t, df						t=17.87 df=27
COCULT-1	10	100	192	19200	100	17700000	3398400000	339840000
COCULT-2	10	100	196.3	19630	100	17000000	3337100000	333710000	358247500	3.66109e+08	2.40339e+07				How big is the difference?
COCULT-2	10	100	196.3	19630	100	19500000	3827850000	382785000							Mean ± SEM of column C						4.478 ± 0.1969 N=24
COCULT-3	10	100	228.5	22850	100	17600000	4021600000	402160000	402160000						Mean ± SEM of column D						0.7721 ± 0.06503 N=24
COCULT-3	10	100	228.5	22850	100	17600000	4021600000	402160000							Difference between means						3.706 ± 0.2074
															95% confidence interval						3.280 to 4.131
								Total JAM1 + NL23							R squared						0.9221
								Coculture-1	1789440000
								Coculture-2	1824608500	1.87533e+09	9.10748e+07				F test to compare variances
								Coculture-3	2011942500						F,DFn, Dfd						9.167, 23, 23
															P value						P<0.0001
															P value summary						***
															Are variances significantly different?						Yes

## Sheet: Figure 4
Transcript levels (Transcripts per million; TPM) relative to those of Bioreactor 2, 0.5% NaCl set to 1.0								Calculation of the ratios
The values represent the ratio of TPM of one condition to
the TPM found in the Bioreactor 2 operated with 0.5% NaCl
								Strain JAM1								Strain NL23
									TPM			Ratio					TPM					Ratio
Genes	Bioreactor 2, 2.75%	Bioreactor 2, IO	Bioreactor 3, 0.5%	Bioreactor 3, 2.0%
							Annotation	Gene number	B2 0.5%	B2 2.75%	B2-IO	2.75%/0.5%	IO/0.5%		Annotation	Gene number	B2 0.5%	B2 2.75%	B2 IO	B3 0.5%	B3 2%	B2 2.75%/B2 0.5%	B2 IO/B2 0.5%	B3 0.5%/B2 0.5%	B3 2%/B2 0.5%
norCBDQ	1.37	-1.89			JAM1, Denitrification			norQDBC								NapEFDABC
norRE	1.16	-1.45					nitric oxide reductase NorQ	Q7A_431	257.472	191.919	121.862				cytochrome c3 family protein	WP_023788093.1	421.96	617.406	576.737	835.961	306.328
narXL	-1.1	-1.21					nitric oxide reductase NorD	Q7A_432	211.998	235.651	116.385				nitrate reductase cytochrome c-type subunit	WP_023788094.1	850.163	1042.29	1103.39	1682.7	450.488
narK1K2GHJI	1.69	2.15					nitric-oxide reductase NorB	Q7A_433	1083.34	2035.94	665.499				periplasmic nitrate reductase subunit alpha	WP_023788095.1	694.578	945.121	925.635	1507.28	474.119
nosRZDEYL	-1.08	-1.23					nitric-oxide reductase NorC	Q7A_434	1048.47	1095.74	473.643				chaperone NapD	WP_023788096.1	578.373	743.204	694.559	1123.16	458.705
narK12f	-3.03	-1.99						Total TPM	2601.28	3559.25	1377.39	1.36827	0.53 (-1.89)		ferredoxin-type protein NapF	WP_041316582.1	601.132	655.634	715.083	1156.25	431.21
nar2GHJI	1.01	-1.18													periplasmic nitrate reductase NapE protein	WP_023788098.1	1557.9	458.949	2489.44	2900.86	974.605
norCBQD	-1.13	-1.34						norRE								Total TPM	4704.11	4462.6	6504.84	9206.21	3095.46	0.95 (-1.05)	1.3828	1.95706	0.66 (-1.52)
							NorR	Q7A_435	227.076	250.678	182.289
NapEFDABC	0.95	1.38	1.96	-1.52	NL23, Denitrification		NorE	Q7A_436	246.167	300.404	144.551					NapGH
napGH	3.7	3.15	1.57	9.33				Total TPM	473.244	551.082	326.84	1.16448	0.69 (-1.45)		quinol dehydrogenase ferredoxin subunit NapH	WP_023785930.1	18.3552	102.397	81.1406	33.759	260.414
nirKV	1.91	3.32	0.85	1.16											ferredoxin-type protein NapG	WP_023785931.1	35.2309	98.3585	88.8756	51.1211	243.998
norCBQDE	-2.53	1.09	1.34	-1.64				narXL								Total TPM	53.5861	200.755	170.016	84.8801	504.412	3.74641	3.17277	1.584	9.41313
nosRZDFYLX	-1.88	-1.03	-1.15	-2.73			NarX sensor protein	Q7A_441	273.912	282.816	260.379
							NarL response regulator protein	Q7A_442	208.8	155.108	139.477					nirKV
NH4 trp	-1.59	37.7			JAM1, N-assimilation			Total TPM	482.712	437.924	399.856	0.91 (-1.10)	0.83 (-1.21)		nitrite reductase copper-containing	WP_023787941.1	1624.9	3075.45	5315.6	1349.69	1844.41
NO3/NO2 trp	-1.11	5.33													SUMF1/EgtB/PvdO family nonheme iron enzyme	WP_041318679.1	333.462	665.356	1179.89	314.416	431.851
nasAnirBD	1.33	40.33						narK1K2GHJI								Total TPM	1958.36	3740.81	6495.49	1664.11	2276.26	1.91017	3.3168	0.85 (-1.18)	1.16233
							NarK1 Nitrate/H+ symporter	Q7A_444	1134.84	1364.42	1733.56
nirBAnasA	7.43	62.3	4.02	29.38	NL23 N-assimilation		NarK2 Nitrate/nitrite antiporter	Q7A_445	1129.5	1851.63	2043.64					norCBQDE
ntrABC trp	4.56	105.53	2.75	23.18			respiratory nitrate reductase subunit alpha NarG	Q7A_446	1013.11	2267.63	2293.24				cytochrome c	WP_023786872.1	3417.95	554.255	3469.24	3997.27	1255.86
NH4 trp	1.39	86.25	-2.05	4.3			respiratory nitrate reductase subunit beta NarH	Q7A_447	794.181	1616.38	1955.55				cbb3-type cytochrome c oxidase subunit I	WP_023786873.1	1587.48	743.714	1691.35	2303.25	676.819
							respiratory nitrate reductase subunit delta NarJ	Q7A_448	811.219	1415.89	2353.69				CbbQ/NirQ/NorQ/GpvN family protein	WP_023786874.1	951.973	636.841	1223.86	1537.37	466.393
aspK-ectABC	4.37	4.74			JAM1, ectoine		respiratory nitrate reductase subunit gamma NarI	Q7A_449	736.062	1007.27	1660.91				VWA domain-containing protein	WP_023786875.1	351.006	406.352	465.575	580.081	286.426
								Total TPM	5618.9	9523.22	12040.6	1.69485	2.14288		cytochrome c oxidase subunit 3	WP_081717830.1	127.518	205.404	178.932	185.334	233.769
																Total TPM	6435.93	2546.57	7028.97	8603.31	2919.27	0.40 (-2.53)	1.09214	1.33676	0.45 (-2.20)
								nosRZDEYL
							nitrous oxide reductase NosR	Q7A_458	216.193	162.432	148.183					nosRZDFYLX
							Nitrous-oxide reductase NosZ	Q7A_459	769.877	1023.01	830.381				FAD:protein FMN transferase	WP_023786986.1	387.721	224.81	389.795	367.485	181.247
							nitrous oxide reductase NosD	Q7A_461	271.895	216.896	198.948				nitrous oxide reductase accessory protein NosL	WP_023786987.1	379.344	216.05	333.438	318.744	170.459
							nitrous oxide reductase NosF	Q7A_462	140.611	106.237	111.409				ABC transporter permease	WP_023786988.1	329.47	236.462	337.201	284.465	164.293
							nitrous oxide reductase NosY	Q7A_463	227.054	127.934	140.607				ABC transporter ATP-binding protein	WP_023786989.1	295.719	222.7	272.817	219.284	186.31
							nitrous oxide reductase NosL	Q7A_464	278.592	131.576	118.743				nitrous oxide reductase family maturation protein NosD	WP_023786990.1	557.647	389.004	619.265	706.841	236.913
								Total TPM	1904.22	1768.09	1548.27	0.93 (-1.08)	0.81 (-1.23)		TAT-dependent nitrous-oxide reductase	WP_023786991.1	1754.58	766.58	1660.11	1404.19	387.118
															regulatory protein NosR	WP_023786992.1	476.256	173.154	437.376	340.178	207.238
								narK12f								Total TPM	4180.74	2228.76	4050	3641.19	1533.58	0.53 (-1.88)	0.97 (-1.03)	0.87 (-1.15)	0.37 (-2.73)
							NarK12f, Nitrate/nitrite transporter	Q7A_479	207.222	68.5011	103.93	0.33 (-3.03)	0.50 (-1.99)
																nirBAnasA
								narIJHG							nitrate reductase	WP_023785708.1	13.1392	75.1747	349.157	39.4713	297.576
							respiratory nitrate reductase subunit gamma NarI	Q7A_481	242.417	150.863	149.571				sulfite reductase subunit alpha	WP_023785709.1	7.9282	84.5363	623.36	48.102	345.447
							respiratory nitrate reductase subunit delta NarJ	Q7A_482	549.419	369.192	414.985				NirA family protein	WP_041316934.1	9.53273	79.3346	906.447	48.775	370.695
							respiratory nitrate reductase subunit beta NarH	Q7A_483	741.861	702.091	707.113				NAD(P)/FAD-dependent oxidoreductase	WP_023785711.1	16.5143	110.112	1049.05	52.7817	367.207
							respiratory nitrate reductase subunit alpha NarG	Q7A_484	798.879	1134.82	712.394					Total TPM	47.1144	349.158	2928.02	189.13	1380.92	7.41085	62.1469	4.01427	29.31
								Total TPM	2332.58	2356.96	1984.06	1.01046	0.85 (-1.18)
																ntrABC trp
								norDQBC							ABC transporter ATP-binding protein	WP_023785712.1	7.64407	57.7331	1548.59	35.2416	322.391
							nitric oxide reductase activation protein NorD	Q7A_485	82.8522	37.2282	43.1549				nitrate ABC transporter permease	WP_081717796.1	6.85261	55.5205	2065.17	30.4968	317.637
							nitric-oxide reductase subunit Q	Q7A_486	256.849	152.169	158.55				ABC transporter substrate-binding protein	WP_023785714.1	8.15049	54.8916	2093.51	35.4625	317.111
							nitric-oxide reductase subunit B	Q7A_487	253.869	206.2	175.554				ABC transporter substrate-binding protein	WP_023785715.1	32.1692	82.3575	96.5476	49.4019	317.857
							nitric-oxide reductase subunit C	Q7A_488	289	385.75	283.224					Total TPM	54.8163	250.503	5803.82	150.603	1275	4.56986	105.878	2.74741	23.2594
								Total TPM	882.57	781.348	660.484	0.89 (-1.13)	0.75 (-1.34)
																NH4 trp
								ammonium transporter							ammonium transporter	WP_023785845.1	51.7276	72.1416	4461.62	25.1813	222.58	1.39464	86.2522	0.49 (-2.05)	4.30292
							ammonium transporter	Q7A_237	82.3879	52.5457	4040.84
							ammonium transporter	Q7A_1141	30.9659	18.6514	218.908
								Total TPM	113.354	71.1971	4259.75	0.63 (-1.59)	37.5792			Annotations and gene numbers are based on the genome annotation
																at NCBI accession number CP006912.1
								NO3/NO2 trp
							NarK family nitrate/nitrite MFS transporter	Q7A_2616	34.3834	31.0352	183.414	0.90 (-1.11)	5.33439			Value under paratheses are the reverse negative ratio (-1/ratio) if this ratio is < 1.00
								nasAnirBD
							nitrate reductase	Q7A_2619	20.9357	21.6432	556.545
							nitrite reductase (NAD(P)H) small subunit	Q7A_2620	8.19318	18.4298	451.685
							nitrite reductase large subunit	Q7A_2621	11.1348	12.6058	604.786
								Total TPM	40.2636	52.6789	1613.02	1.30835	40.0614
								Ectoine
							diaminobutyrate acetyltransferase	Q7A_1475	30.2787	47.0836	162.705
							diaminobutyrate--2-oxoglutarate transaminase	Q7A_1476	68.2337	366.319	357.296
							L-ectoine synthase	Q7A_1477	109.134	631.5	651.683
							aspartate kinase	Q7A_1478	70.934	172.92	150.337
								Total TPM	278.58	1217.82	1322.02	4.37153	4.74557
								Annotations and gene numbers are based on the genome annotation
								at NCBI accession number CP003390.3
								Value under paratheses are the reverse negative ratio (-1/ratio) if this ratio is < 1.00
