# Supplementary material for: Co-culturing Hyphomicrobium nitrativorans strain NL23 and Methylophaga nitratireducenticrescens strain JAM1 allows sustainable denitrifying activities under marine conditions
Source: PeerJ. 2021 Nov 1;9:e12424. doi: 10.7717/peerj.12424 (PMC8567858; doi:10.7717/peerj.12424)
Supplement: Supplemental Information 5 [file peerj-09-12424-s005.xlsx]

## Sheet: Reactor 1
			Bioreactor operating conditions	NO3 reduction rate	Coefficient regression R2	NOx reduction rates	Coefficient regression R2
				mN-NO3 h-1		mN-NOx h-1
			0.5% NaCl	2.0129	0.9886	2.0129	0.9886
			1% NaCl	1.6204	0.9884	1.6204	0.9884
			2% NaCl	5.0878	0.9633	5.1135	0.966
			2.75% NaCl	1.4006	0.9605	1.4372	0.9116
			IO no supp	0.2485	0.9792	0.0313	0.8256
			IO + supp*	0.8625	1	0.0972	0.9874
			*NO3 reduction rate was deduced from two time points
Bio-reactor 1
	Time (hrs)	0	1	2	3	4	5	6	7	8	24
0.5% NaCl	NO3 mM	18.4977	14.8264	13.3281	11.3609	8.64809	7.8311	5.80074	4.00583	1.1204	0
	NO2 mM	0	0	0	0.218475	0	0	0	0	0	0
	NOx mM	18.4977	14.8264	13.3281	11.5794	8.64809	7.8311	5.80074	4.00583	1.1204	0
	Time (hrs)	0	1	2	3	4	5	6	7	8	11	25
1.0% NaCl	NO3 mM	18.0279	16.4289	14.9225	12.3824	10.8947	10.2726	7.82926	6.93091	5.98625	3.27051	0.193118
	NO2 mM	0	0	0	0	0	0	0	0	0	0	0
	NOx mM	18.0279	16.4289	14.9225	12.3824	10.8947	10.2726	7.82926	6.93091	5.98625	3.27051	0.193118
	Time (hrs)	0	1	2	3	5	7	9	24
2.0% NaCl	NO3 mM	27.5306	19.7718	18.4884	8.92861	1.9816	0.702847	0	0
	NO2 mM	0	0.316374	0	0	0	0	0	0
	NOx mM	27.5306	20.0882	18.4884	8.92861	1.9816	0.702847	0	0
	Time (hrs)	0	1	2	4	6	8	12	24	48
2.75% NaCl	NO3 mM	25.0086	24.0043	22.091	20.5631	19.6628	14.6369	7.55799	0.384093	0.0483683
	NO2 mM	0.678691	1.41776	2.04914	5.35294	7.85159	13.8011	6.53317	2.538	0.355633
	NOx mM	25.6873	25.4221	24.1401	25.916	27.5144	28.438	14.0912	2.92209	0.404001
	Time (hrs)	0	24	48	72	96	192	288
IO no sup	NO3 mM	22.159	18.4949	10.3429	3.17309	0	0	0
	NO2 mM	1.2169	4.91048	12.4965	19.3235	22.3616	21.1012	13.4816
	NOx mM	23.3759	23.4053	22.8395	22.4966	22.3616	21.1012	13.4816
	Time (hrs)	0	24	48	72	96	120	144	168	192	216	240	264	288
IO with sup	NO3 mM	20.6551	0	0	0	0	0	0	0	0	0	0	0	0
	NO2 mM	1.18669	25.0561	22.4557	23.7586	17.9778	16.4028	14.7203	11.68	9.11776	6.77373	4.68827	2.20322	0.47137		mM NO3 h-1
	NOx mM	21.8418	25.0561	22.4557	23.7586	17.9778	16.4028	14.7203	11.68	9.11776	6.77373	4.68827	2.20322	0.47137		0.8625

## Sheet: Reactor 2
				Bioreactor operating conditions	NO3 reduction rate	Coefficient regression R2	NOx reduction rates	Coefficient regression R2
					mN-NO3 h-1		mN-NOx h-1
				0.5% NaCl	2.5629	0.9969	0.8786	0.9591
				1% NaCl	2.7321	0.9736	1.3017	0.9653
				2% NaCl	5.2642	0.9747	1.0894	0.9896
				2.75% NaCl	7.1418	0.9647	2.1855	0.9837
				IO +supp	5.1969	0.9565	0.942	0.9906
				IO no supp	less than 24 h		less than 24 h
Bio-reactor 2
	Time (hrs)	0	1	2	3	4	5	6	16
	NO3 mM	16.6887	14.6028	11.6874	8.91442	6.71832	5.57028	4.89103	0
0.5% NaCl	NO2 mM	0	1.12296	2.76509	4.55188	5.50645	6.71632	6.63255	0
	NOx mM	16.6887	15.7257	14.4525	13.4663	12.2248	12.2866	11.5236	0
1.0% NaCl	Time (hrs)	0	1	2	3	4	5	6	7	16
	NO3 mM	19.0725	15.7787	14.1055	9.63712	8.48291	7.62094	6.77609	6.19783	0
	NO2 mM	1.31757	2.77491	5.20424	6.73499	7.12962	6.34686	5.74295	5.27967	0
	NOx mM	20.3901	18.5536	19.3098	16.3721	15.6125	13.9678	12.519	11.4775	0
2.0% NaCl	Time (hrs)	0	1	2	3	4	5	6	16
	NO3 mM	19.635	12.4735	7.03454	3.90065	3.37369	3.40024	2.97978	0.202735
	NO2 mM	0	6.73596	11.2675	13.2903	13.0424	11.7292	10.6621	0
	NOx mM	19.635	19.2095	18.302	17.191	16.416	15.1294	13.6419	0.202735
2.75% NaCl	Time (hrs)	0	1	2	3	4	5	6	7	8	24
	NO3 mM	20.6301	11.1236	6.34649	5.58251	4.76048	4.29178	4.04054	3.38072	2.24372	0.219817
	NO2 mM	0.139685	10.0953	14.0884	13.3573	12.3603	10.8454	9.21815	6.34417	5.22348	0.147445
	NOx mM	20.7698	21.219	20.4349	18.9398	17.1207	15.1372	13.2587	9.72489	7.4672	0.367262
IO with sup	Time (hrs)	0	1	2	3	4	5	6	7	23
	NO3 mM	22.084	20.1597	12.3373	7.3683	5.23133	5.46435	4.93823	5.35222	0
	NO2 mM	0	0	7.33417	11.7969	12.9363	12.991	11.2905	10.8896	0
	NOx mM	22.084	20.1597	19.6715	19.1652	18.1676	18.4553	16.2287	16.2419	0
IO no sup	Time h	0	18	0	24	0	24
	NO3	12.2256	0	16.6533	0	15.951	0
	Nitrite	0.0395099	0	0.0967589	0.00685375	0.637399	0
	NOx	12.2651	0	16.75	0	16.5884	0

## Sheet: Reactor 3
														Bioreactor operating conditions	NO3 reduction rate	Coefficient regression R2	NOx reduction rates	Coefficient regression R2
															mN-NO3 h-1		mN-NOx h-1
														0% NaCl	5.1222	0.9509	5.0447	0.9481
														0.5% NaCl	2.7435	0.9948	2.7435	0.9948
														1% NaCl	2.5737	0.9813	2.6848	0.9844
														2% NaCl	2.7002	0.9838	0.5337	0.9746
														2.75% NaCl (0-96 h)	NA	NA	0.114	0.7276
														2.75% NaCl (0-6 h)	3.228	0.9684	NA	NA
														2.75% NaCl (6-32 h)	0.2021	0.7278	NA	NA
														IO + supp	uncertain	NA	0.105	0.9977
															NA: Not applicable
															uncertain: no sampling in the first hours.
		Units
		Time: Hour
		NO3, NO2 NOx: mM
Bio-reactor 3
	Time (hrs)	0	1	2	3	4	5	6	7	8	9	24
0% NaCl	NO3 mM	28.2713	26.5251	25.4293	24.5315	12.6565	11.5865	6.02919	1.4318	1.50792	1.28983	1.09973
	NO2 mM	0.256594	-0.00106251	0.722323	0	0	0	0	0.179562	0.0458646	0	0
	NOx mM	28.5278	26.5241	26.1516	24.5315	12.6565	11.5865	6.02919	1.61136	1.55379	1.28983	1.09973
0.5% NaCl	Time (hrs)	0	1	3	4	5	6	7	27
	NO3 mM	22.9113	20.7045	14.6884	12.3139	9.43882	7.59954	3.22372	1.48513
	NO2 mM	0	0	0	0	0	0.0223699	0	0
	NOx mM	22.9113	20.7045	14.6884	12.3139	9.43882	7.62191	3.22372	1.48513
1.0% NaCl	Time (hrs)	0	1	2	3	4	5	6	7	24
	NO3 mM	23.0166	19.9831	18.9695	16.3958	12.5932	11.3499	6.3772	5.65961	4.86793
	NO2 mM	1.03335	0.388577	0.186371	0	0	0	0.0264762	0.038676	0.0256975
	NOx mM	24.0499	20.3717	19.1559	16.3958	12.5932	11.3499	6.40368	5.69828	4.89363
2.0% NaCl	Time (hrs)	0	1	2	3	4	5	6	7	8	9	24	26	28	30	32
	NO3 mM	22.3395	19.4403	14.4489	13.8813	9.90205	8.2143	5.52851	3.11485	2.34623	2.04463	1.32829	1.03831	0.921004	0.666218	0.799316
	NO2 mM	0	1.5159	4.98217	5.04347	7.95647	9.20005	11.5165	12.658	12.9561	11.0519	6.38585	5.44727	4.79521	3.36139	3.63954
	NOx mM	22.3395	20.9562	19.431	18.9248	17.8585	17.4143	17.045	15.7728	15.3024	13.0965	7.71413	6.48558	5.71622	4.0276	4.43885
2.75% NaCl	Time (hrs)	0	1	2	3	6	24	27	32	47	48	96
	NO3 mM	24.0992	21.3832	19.2741	12.4303	5.44251	4.32348	0.652915	0	0	0	2.05149
	NO2 mM	0.311845	1.8047	2.437	8.57231	16.0132	16.6541	17.1284	14.5707	17.7536	13.4618	11.4493
	NOx mM	24.4122	23.1879	21.7111	21.0026	21.4557	19.6176	17.7813	14.5141	17.1943	13.0387	13.5008
IO with sup	Time (hrs)	0	53	72	79	96
	NO3 mM	23.7657	3.40315	3.33881	2.99431	2.5799
	NO2 mM	0.546915	15.555	13.6038	13.303	11.4753
	NOx mM	24.3127	18.9582	16.9426	16.2973	14.0552
	NO3 reduction rate		uncertain. First T1 at 53h
