# Supplementary material for: Co-culturing Hyphomicrobium nitrativorans strain NL23 and Methylophaga nitratireducenticrescens strain JAM1 allows sustainable denitrifying activities under marine conditions
Source: PeerJ. 2021 Nov 1;9:e12424. doi: 10.7717/peerj.12424 (PMC8567858; doi:10.7717/peerj.12424)
Supplement: Supplemental Information 6 [file peerj-09-12424-s006.xlsx]

## Sheet: Table 7
	NL23 napA							NL23 nirK							JAM1 narG1							JAM1 narG2
		Rt-qPCR results for strain NL23 napA							Rt-qPCR results for strain NL23 nirK							Rt-qPCR results for strain JAM1 narG1							Rt-qPCR results for strain JAM1 narG2
		Reactor B2	Reactor B2	Reactor B2	Reactor B3	Reactor B3			Reactor B2	Reactor B2	Reactor B2	Reactor B3	Reactor B3			Reactor B2	Reactor B2	Reactor B2					Reactor B2	Reactor B2	Reactor B2
	RT-qPCR assays	0.5% NaCl	2.75% NaCl	IO medium	0.5% NaCl	2% NaCl		RT-qPCR assays	0.5% NaCl	2.75% NaCl	IO medium	0.5% NaCl	2% NaCl		RT-qPCR assays	0.5% NaCl	2.75% NaCl	IO medium				RT-qPCR assays	0.5% NaCl	2.75% NaCl	IO medium
		napA copies per 100 copies of rpoB							nirK copies per 100 copies of rpoB							narG1 copies per 100 copies of rpoB							narG2 copies per 100 copies of rpoB
	1	147.134	25.9604	32.1324	20.6711	32.9231		1	267.516	51.3388	44.2647	441.331	193.538		1	141.373	128.619	174.292				1	51.5845	94.6755	91.0675
	2	549.045	35.2736	26.5441	13.8255	6.4		2	378.981	91.5888	34.8661	35.302	207.385		2	114.613	142.097	51.9608				2	52.4648	65.391	65.2505
	3	492.582	47.3364	44.9045	50.4673	13.9806		3	239.642	177.586	79.9363	66.729	148.065		3	170.488	151.272	430.108				3	62.2081	111.35	224.731
	4	289.169	82.7586	49.2516	79.3084	10.0215		4	959.941	553.448	139.427	352.71	595.768		4	138.217	167.123	128.226				4	63.2696	76.908	161.022
	5	1450.42	90.6466	34.0251	29.1199	9.12043		5	543.472	113.875	60.5695	38.503			5	158.659	241.52	385.238				5	54.6286	93.251	157.544
	6	851.464	53.068	37.319	45.7614			6		354.892	105.647	203.516			6	172.85	229.943	153.689				6	59.4219	104.341	202.237
	7		58.126												7	185.145	232.098	141.266				7	42.9393	74.2994	94.0341
								Average	477.91	223.788	77.4517	189.682	286.189		8	135.864	183.211	91.733				8	46.7069	83.1356	120.71
	Average	629.968	56.1671	37.3628	39.859	14.4891		Standard error	219.037	153.588	30.8849	142.837	154.79		9	145.528	184.928	84.3182
	Standard error	347.314	18.0086	6.47684	18.6534	7.37358																Average	54.153	87.919	139.575
															Average	151.415	184.535	182.314				Standard error	5.09252	11.5426	41.6079
	Table Analyzed	Data 1						Table Analyzed	Data 1						Standard error	18.107	33.4113	100.159
	One-way analysis of variance							One-way analysis of variance
	P value	P<0.0001						P value	0.0357						Table Analyzed	Data 1						Table Analyzed	Data 1
	P value summary	***						P value summary	*
	Are means signif. different? (P < 0.05)	Yes						Are means signif. different? (P < 0.05)	Yes						One-way analysis of variance							One-way analysis of variance
	Number of groups	5						Number of groups	5						P value	0.6363						P value	0.0002
	F	9.529						F	3.115						P value summary	ns						P value summary	***
	R squared	0.6039						R squared	0.3616						Are means signif. different? (P < 0.05)	No						Are means signif. different? (P < 0.05)	Yes
															Number of groups	3						Number of groups	3
	Bartlett's test for equal variances							ANOVA Table	SS	df	MS				F	0.4607						F	12.76
	Bartlett's statistic (corrected)	88.77						Treatment (between columns)	466800	4	116700				R squared	0.03697						R squared	0.5486
	P value	P<0.0001						Residual (within columns)	824200	22	37460
	P value summary	***						Total	1291000	26					Bartlett's test for equal variances							Bartlett's test for equal variances
	Do the variances differ signif. (P < 0.05)	Yes													Bartlett's statistic (corrected)	22.6						Bartlett's statistic (corrected)	23.93
								Tukey's Multiple Comparison Test	Mean Diff.	q	Significant? P < 0.05?	Summary	95% CI of diff		P value	P<0.0001						P value	P<0.0001
	ANOVA Table	SS	df	MS				B2-0.5% vs B2-2.75%	254.1	3.066	No	ns	-93.88 to 602.1		P value summary	***						P value summary	***
	Treatment (between columns)	1683000	4	420800				B2-0.5% vs B2-IO	400.5	4.832	Yes	*	52.46 to 748.5		Do the variances differ signif. (P < 0.05)	Yes						Do the variances differ signif. (P < 0.05)	Yes
	Residual (within columns)	1104000	25	44160				B2-0.5% vs B3-0.5%	288.2	3.478	No	ns	-59.77 to 636.2
	Total	2787000	29					B2-0.5% vs B3-2.0%	191.7	2.088	No	ns	-193.8 to 577.2		ANOVA Table	SS	df	MS				ANOVA Table	SS	df	MS
								B2-2.75% vs B2-IO	146.3	1.852	No	ns	-185.5 to 478.1		Treatment (between columns)	6170	2	3085				Treatment (between columns)	29610	2	14810
	Tukey's Multiple Comparison Test	Mean Diff.	q	Significant? P < 0.05?	Summary	95% CI of diff		B2-2.75% vs B3-0.5%	34.11	0.4316	No	ns	-297.7 to 365.9		Residual (within columns)	160700	24	6696				Residual (within columns)	24360	21	1160
	B2-0.5% vs B2-2.75%	573.8	6.941	Yes	***	230.3 to 917.3		B2-2.75% vs B3-2.0%	-62.4	0.7063	No	ns	-433.4 to 308.6		Total	166900	26					Total	53980	23
	B2-0.5% vs B2-IO	592.6	6.908	Yes	***	236.1 to 949.1		B2-IO vs B3-0.5%	-112.2	1.42	No	ns	-444.0 to 219.6
	B2-0.5% vs B3-0.5%	590.1	6.879	Yes	***	233.6 to 946.6		B2-IO vs B3-2.0%	-208.7	2.363	No	ns	-579.7 to 162.2		Tukey's Multiple Comparison Test	Mean Diff.	q	Significant? P < 0.05?	Summary	95% CI of diff		Tukey's Multiple Comparison Test	Mean Diff.	q	Significant? P < 0.05?	Summary	95% CI of diff
	B2-0.5% vs B3-2.0%	615.5	6.841	Yes	***	241.6 to 989.4		B3-0.5% vs B3-2.0%	-96.51	1.092	No	ns	-467.5 to 274.5		B2-0.5% vs B2-2.75%	-33.12	1.214	No	ns	-129.5 to 63.22		B2-0.5% vs B2-2.75%	-33.77	2.804	No	ns	-76.72 to 9.183
	B2-2.75% vs B2-IO	18.81	0.2275	No	ns	-324.7 to 362.3									B2-0.5% vs B2-IO	-30.9	1.133	No	ns	-127.2 to 65.44		B2-0.5% vs B2-IO	-85.42	7.093	Yes	***	-128.4 to -42.47
	B2-2.75% vs B3-0.5%	16.31	0.1973	No	ns	-327.2 to 359.8									B2-2.75% vs B2-IO	2.219	0.08135	No	ns	-94.12 to 98.56		B2-2.75% vs B2-IO	-51.65	4.289	Yes	*	-94.60 to -8.703
	B2-2.75% vs B3-2.0%	41.68	0.4791	No	ns	-319.8 to 403.2
	B2-IO vs B3-0.5%	-2.498	0.02912	No	ns	-359.0 to 354.0
	B2-IO vs B3-2.0%	22.87	0.2542	No	ns	-351.0 to 396.7
	B3-0.5% vs B3-2.0%	25.37	0.282	No	ns	-348.5 to 399.2
